# Supplementary material for: Secondary Hyperalgesia Phenotypes Exhibit Differences in Brain Activation during Noxious Stimulation
Source: PubMed Central journal article supplement (PMC4304709; doi:10.1371/journal.pone.0114840), 2015-01-23
Supplement: pone.0114840.s001.pdf [file pone.0114840.s001.pdf]

| Subject no | Sex | Group | Dominant hand | Age       | Height | Weight |
|------------|-----|-------|---------------|-----------|--------|--------|
| H1         |     | 2     | 1 R           | 25,210959 | 180    | 75     |
| L1         |     | 2     | 2 R           | 24,405479 | 172    | 65     |
| L2         |     | 1     | 2 R           | 22,873973 | 184    | 83     |
| H2         |     | 1     | 1 R           | 23,035616 | 186    | 80     |
| H3         |     | 2     | 1 R           | 25,364384 | 164    | 60     |
| H4         |     | 1     | 1 R           | 22,649315 | 181    | 74     |
| H5         |     | 2     | 1 R           | 25,358904 | 175    | 68     |
| H6         |     | 2     | 1 R           | 23,589041 | 165    | 63     |
| H7         |     | 1     | 1 L           | 23,742466 | 188    | 80     |
| L3         |     | 1     | 2 R           | 22,879452 | 188    | 70     |
| H8         |     | 1     | 1 R           | 23,610959 | 180    | 70     |
| H9         |     | 2     | 1 R           | 21,693151 | 170    | 63     |
| H10        |     | 2     | 1 R           | 21,80274  | 165    | 58     |
| H11        |     | 2     | 1 R           | 24,120548 | 174    | 73     |
| L4         |     | 2     | 2 R           | 31,175342 | 163    | 55     |
| H12        |     | 1     | 1 R           | 31,506849 | 182    | 75     |
| L5         |     | 1     | 2 R           | 27,578082 | 177    | 71     |
| H13        |     | 2     | 1 R           | 23,531507 | 165    | 65     |
| H14        |     | 2     | 1 R           | 23,232877 | 157    | 50     |
| H15        |     | 2     | 1 R           | 23,175342 | 169    | 69     |
| L6         |     | 1     | 2 R           | 21,052055 | 195    | 81     |
| L7         |     | 1     | 2 R           | 22,369863 | 184    | 79     |
| H16        |     | 1     | 1 R           | 25,40274  | 190    | 83     |
| L8         |     | 1     | 2 R           | 29,378082 | 196    | 95     |
| H17        |     | 2     | 1 R           | 28,70137  | 183    | 73     |
| H18        |     | 2     | 1 R           | 22,816438 | 185    | 73     |
| L9         |     | 1     | 2 R           | 22,060274 | 182    | 80     |
| L10        |     | 2     | 2 R           | 23,29863  | 165    | 61     |
| H19        |     | 2     | 1 R           | 22,846575 | 172    | 62     |
| L11        |     | 1     | 2 L           | 21,506849 | 173    | 64     |
| L12        |     | 1     | 2 R           | 26,550685 | 165    | 64     |
| L13        |     | 1     | 2 R           | 22,810959 | 188    | 82     |
| L14        |     | 2     | 2 R           | 21,794521 | 160    | 65     |
| H20        |     | 2     | 1 R           | 24,816438 | 174    | 60     |
| L15        |     | 2     | 2 R           | 25,194521 | 168    | 62     |
| L16        |     | 1     | 2 R           | 23,723288 | 186    | 77     |
| L17        |     | 2     | 2 R           | 24,493151 | 176    | 70     |
| L18        |     | 1     | 2 R           | 25,106849 | 196    | 78     |
| L19        |     | 2     | 2 R           | 23,243836 | 165    | 56     |
| L20        |     | 2     | 2 R           | 23,4      | 175    | 72     |

H: High-sensitization responders

L: Low-sensitization responders

R: Right handed

L: Left handed

sex

1: Male

2: Female
