# Supplementary material for: Secondary Hyperalgesia Phenotypes Exhibit Differences in Brain Activation during Noxious Stimulation
Source: PubMed Central journal article supplement (PMC4304709; doi:10.1371/journal.pone.0114840), 2015-01-23
Supplement: pone.0114840.s002.pdf [file pone.0114840.s002.pdf]

| Subject No | Sex | Group | T1sys | T2sys | T3sys | T4sys | T5sys | T6sys |
|------------|-----|-------|-------|-------|-------|-------|-------|-------|
| H1         |     | 2 1   | 116   | 117   | 115   | 126   | 124   | 122   |
| L1         |     | 2 2   |       |       |       |       |       |       |
| L2         |     | 1 2   |       | 134   | 133   | 145   | 135   | 136   |
| H2         |     | 1 1   | 153   | 141   | 142   |       |       | 146   |
| H3         |     | 2 1   | 120   | 116   | 114   | 117   | 117   | 133   |
| H4         |     | 1 1   | 134   | 131   | 134   | 130   | 133   | 124   |
| H5         |     | 2 1   | 122   | 116   | 121   |       |       |       |
| H6         |     | 2 1   | 115   | 118   | 121   | 120   | 127   | 121   |
| H7         |     | 1 1   | 125   | 124   | 135   | 135   | 133   | 142   |
| L3         |     | 1 2   | 133   | 108   | 107   |       | 115   | 115   |
| H8         |     | 1 1   | 112   | 113   | 114   |       |       | 110   |
| H9         |     | 2 1   | 116   | 114   | 112   | 116   |       | 122   |
| H10        |     | 2 1   | 121   | 118   | 119   | 121   |       | 123   |
| H11        |     | 2 1   | 114   | 108   | 114   | 116   | 120   | 112   |
| L4         |     | 2 2   | 126   | 125   | 128   | 126   |       | 129   |
| H12        |     | 1 1   | 116   | 108   | 113   | 111   |       | 110   |
| L5         |     | 1 2   | 135   | 123   | 126   | 126   | 127   | 128   |
| H13        |     | 2 1   | 118   | 115   | 116   | 116   | 114   | 129   |
| H14        |     | 2 1   | 120   | 121   | 123   | 122   | 139   | 120   |
| H15        |     | 2 1   | 126   | 125   | 122   | 127   | 125   | 120   |
| L6         |     | 1 2   | 128   | 110   | 116   | 113   |       | 121   |
| L7         |     | 1 2   | 123   | 121   | 127   | 124   | 125   | 129   |
| H16        |     | 1 1   | 132   | 125   | 124   | 130   |       | 142   |
| L8         |     | 1 2   | 111   | 109   | 108   | 109   | 110   | 101   |
| H17        |     | 2 1   | 125   | 122   | 123   | 120   | 122   | 120   |
| H18        |     | 2 1   | 140   | 139   | 138   | 137   | 140   | 139   |
| L9         |     | 1 2   | 126   | 124   | 125   | 126   |       | 131   |
| L10        |     | 2 2   | 118   | 121   | 118   | 117   | 117   | 116   |
| H19        |     | 2 1   | 124   | 118   | 115   | 121   | 118   | 116   |
| L11        |     | 1 2   | 128   | 118   | 123   | 123   | 124   | 133   |
| L12        |     | 1 2   | 129   | 127   | 121   | 127   | 122   | 110   |
| L13        |     | 1 2   | 134   |       | 132   | 132   |       |       |
| L14        |     | 2 2   | 102   | 101   | 104   | 100   | 103   | 119   |
| H20        |     | 2 1   | 124   | 126   | 127   | 126   | 132   | 125   |
| L15        |     | 2 2   | 112   | 114   | 110   | 120   | 121   | 112   |
| L16        |     | 1 2   | 125   | 122   | 125   | 125   | 122   | 133   |
| L17        |     | 2 2   | 127   | 116   | 116   | 117   | 116   | 113   |
| L18        |     | 1 2   | 114   | 116   | 118   | 118   | 120   | 121   |
| L19        |     | 2 2   | 130   | 130   | 122   | 122   | 122   | 132   |
| L20        |     | 2 2   | 140   | 120   | 121   | 123   | 123   | 122   |

H: High sensitization responders

L: Low sensitization responders

sex:

1: Male

2: Female

Sys: Systolic blood pressure

Dia: Diastolic blood pressure

Pulse: Heart rate

Co2: End-Tidal Co2

Group

1: High sensitization responders

2: Low sensitization responders

| T7sys | T8sys | T9sys | T10sys | T1dia | T2dia | T3dia | T4dia | T5dia |  |
|-------|-------|-------|--------|-------|-------|-------|-------|-------|--|
| 124   | 123   | 124   | 125    | 72    | 72    | 70    | 75    | 76    |  |
| 135   | 133   | 138   | 135    |       | 65    | 62    | 72    | 72    |  |
| 149   | 158   | 144   | 148    | 83    | 72    | 68    |       |       |  |
| 129   | 123   | 125   | 124    | 69    | 66    | 64    | 67    | 78    |  |
| 127   | 128   | 118   | 122    | 71    | 66    | 70    | 62    | 67    |  |
| 123   | 122   | 123   | 123    | 58    | 54    | 66    |       |       |  |
| 118   | 120   | 120   | 120    | 75    | 69    | 70    | 67    | 71    |  |
| 145   | 105   | 130   | 137    | 79    | 72    | 82    | 83    | 84    |  |
| 113   | 115   | 116   | 120    | 84    | 64    | 62    |       | 68    |  |
| 117   | 110   | 117   | 119    | 61    | 57    | 58    |       |       |  |
| 121   | 118   | 124   | 124    | 57    | 59    | 58    | 68    |       |  |
| 116   | 115   | 112   | 122    | 77    | 73    | 74    | 72    |       |  |
| 111   | 111   | 114   | 108    | 63    | 63    | 63    | 65    | 82    |  |
| 124   | 113   | 114   | 117    | 75    | 79    | 74    | 75    |       |  |
| 116   | 113   | 113   | 110    | 71    | 71    | 72    | 72    |       |  |
| 123   | 126   | 123   | 125    | 74    | 66    | 61    | 66    | 66    |  |
| 125   | 117   | 127   | 122    | 76    | 67    | 70    | 65    | 70    |  |
| 112   | 119   | 116   | 115    | 69    | 79    | 85    | 88    | 95    |  |
| 117   | 116   | 120   | 121    | 75    | 79    | 76    | 78    | 74    |  |
| 118   | 117   | 119   | 124    | 66    | 61    | 53    | 54    |       |  |
| 153   | 123   | 126   | 128    | 62    | 67    | 71    | 61    | 62    |  |
| 136   | 133   | 136   | 142    | 68    | 68    | 62    | 69    |       |  |
| 103   | 100   | 100   | 101    | 61    | 60    | 62    | 67    | 69    |  |
| 116   | 117   | 114   | 121    | 61    | 59    | 58    | 57    | 59    |  |
| 133   | 134   | 133   | 144    | 77    | 75    | 66    | 69    | 72    |  |
| 135   | 128   | 140   | 136    | 57    | 56    | 59    | 60    |       |  |
| 114   | 112   | 115   | 113    | 63    | 63    | 61    | 61    | 67    |  |
| 112   | 111   | 117   | 125    | 70    | 71    | 72    | 70    | 70    |  |
| 123   | 128   | 121   | 127    | 73    | 64    | 69    | 68    | 68    |  |
| 120   | 120   | 119   | 118    | 70    | 62    | 69    | 66    | 64    |  |
|       | 118   | 118   |        | 67    |       | 67    | 62    |       |  |
| 120   | 118   | 115   | 123    | 57    | 55    | 58    | 55    | 60    |  |
| 126   | 125   | 126   | 126    | 80    | 68    | 64    | 66    | 69    |  |
| 111   | 108   | 106   | 108    | 66    | 67    | 66    | 61    | 71    |  |
| 132   | 130   | 132   | 127    | 63    | 60    | 59    | 61    | 60    |  |
| 113   | 112   | 112   | 113    | 74    | 74    | 68    | 66    | 66    |  |
| 119   | 114   | 126   | 122    | 56    | 58    | 55    | 56    | 56    |  |
| 122   | 123   | 125   | 125    | 73    | 100   | 70    | 69    | 72    |  |
| 144   | 136   | 137   | 134    | 79    | 73    | 76    | 73    | 72    |  |

| T6dia | T7dia | T8dia | T9dia | T10dia | T1pulse | T2pulse | T3pulse | T4pulse |
|-------|-------|-------|-------|--------|---------|---------|---------|---------|
| 68    | 73    | 70    | 77    | 78     | 72      | 70      | 70      | 75      |
| 68    | 71    | 67    | 68    | 68     |         | 45      | 39      | 44      |
| 71    | 62    | 62    | 70    | 74     | 61      | 55      | 47      |         |
| 67    | 60    | 65    | 74    | 72     | 65      | 61      | 64      | 68      |
| 72    | 60    | 60    | 64    | 72     | 49      | 61      | 54      | 56      |
|       | 70    | 66    | 76    | 68     | 65      | 68      | 67      |         |
| 67    | 67    | 66    | 70    | 75     | 62      | 60      | 57      | 66      |
| 70    | 64    | 60    | 67    | 64     | 57      | 57      | 56      | 57      |
| 61    | 63    | 65    | 70    | 68     | 72      | 70      | 71      | 61      |
| 70    | 62    | 67    | 70    | 69     | 72      | 71      | 71      |         |
| 61    | 57    | 60    | 61    | 64     | 54      | 51      | 55      | 58      |
| 76    | 77    | 75    | 76    | 87     | 85      | 72      | 73      | 67      |
| 65    | 69    | 66    | 64    | 69     | 48      | 50      | 55      | 53      |
| 77    | 72    | 67    | 71    | 72     | 62      | 63      | 60      | 57      |
| 42    | 71    | 66    | 64    | 65     | 75      | 71      | 72      | 73      |
| 65    | 62    | 63    | 64    | 85     | 45      | 48      | 46      | 49      |
| 72    | 63    | 59    | 56    | 64     | 71      | 69      | 73      | 71      |
| 79    | 64    | 64    | 62    | 65     | 61      | 71      | 75      | 63      |
| 74    | 72    | 75    | 77    | 77     | 67      | 75      | 78      | 79      |
| 57    | 55    | 58    | 59    | 62     | 72      | 59      | 59      | 59      |
| 63    | 42    | 51    | 61    | 64     | 58      | 55      | 50      | 48      |
| 69    | 72    | 68    | 69    | 65     | 59      | 67      | 66      | 72      |
| 56    | 60    | 56    | 61    | 60     | 41      | 42      | 43      | 51      |
| 81    | 60    | 63    | 64    | 62     | 54      | 54      | 54      | 59      |
| 69    | 74    | 70    | 71    | 63     | 58      | 53      | 51      | 51      |
| 66    | 68    | 68    | 66    | 64     | 60      | 60      | 63      | 57      |
| 59    | 63    | 61    | 61    | 58     | 59      | 56      | 54      | 51      |
| 68    | 71    | 67    | 65    | 72     | 59      | 58      | 65      | 61      |
| 79    | 71    | 68    | 74    | 72     | 85      | 74      | 78      | 71      |
| 67    | 61    | 62    | 67    | 71     | 88      | 91      | 84      | 95      |
|       |       | 62    | 62    |        | 58      | 59      | 58      | 59      |
| 62    | 62    | 63    | 60    | 60     | 71      | 58      | 57      | 58      |
| 68    | 66    | 64    | 66    | 68     | 64      | 60      | 61      | 59      |
| 67    | 64    | 66    | 65    | 70     | 71      | 66      | 63      | 57      |
| 64    | 57    | 63    | 57    | 57     | 37      | 38      | 38      | 38      |
| 66    | 61    | 63    | 65    | 65     | 64      | 61      | 60      | 59      |
| 65    | 56    | 58    | 56    | 60     | 65      | 65      | 63      | 60      |
| 65    | 66    | 64    | 67    | 69     | 47      | 57      | 52      | 57      |
| 71    | 68    | 67    | 72    | 80     | 58      | 52      | 58      | 66      |

| T5pulse | T6pulse | T7 pulse | T8 pulse | T9pulse | T10pulse | T1co2 | T2co2 | T3co2 |
|---------|---------|----------|----------|---------|----------|-------|-------|-------|
| 76      | 68      | 73       | 70       | 77      | 78       | 4,4   | 4,2   | 4,6   |
|         |         |          |          |         |          |       |       |       |
| 43      | 45      | 44       | 51       | 50      | 53       |       | 4,7   | 4,9   |
|         | 52      | 43       | 44       | 38      | 53       | 4,2   | 4,6   | 4,2   |
| 71      | 69      | 71       | 62       | 76      | 74       | 4,8   | 4,6   | 4,7   |
| 58      | 53      | 65       | 55       | 54      | 54       | 4,8   | 4,5   | 4,9   |
|         |         | 66       | 64       | 66      | 71       | 4,7   | 4,7   | 4,6   |
| 53      | 51      | 59       | 51       | 65      | 63       | 4,5   | 4,7   | 4,7   |
| 61      | 66      | 56       | 55       | 66      | 58       | 5     | 5,1   | 5,1   |
| 75      | 65      | 63       | 61       | 80      | 72       | 4,8   | 4,7   | 4,7   |
|         | 72      | 74       | 72       | 74      | 73       | 5,6   | 5,4   | 5,5   |
|         | 51      | 50       | 50       | 54      | 50       | 4,2   | 3,9   | 3,9   |
|         | 74      | 65       | 76       | 72      | 69       | 4,3   | 4,6   | 4,3   |
| 51      | 67      | 58       | 54       | 48      | 57       | 4,3   | 4,2   | 4,3   |
|         | 61      | 65       | 68       | 69      | 70       | 5,4   | 5,3   | 5,5   |
|         | 79      | 68       | 75       | 72      | 70       | 5,4   | 5,1   | 5,3   |
| 53      | 48      | 48       | 51       | 55      | 67       | 5,3   | 5,6   | 5,6   |
| 72      | 73      | 72       | 72       | 71      | 71       | 4,5   | 4,5   | 4,5   |
| 91      | 64      | 70       | 54       | 57      | 76       | 5,1   | 5,2   | 5     |
| 82      | 73      | 71       | 74       | 75      | 81       | 4,2   | 4,1   | 4,2   |
|         | 62      | 56       | 57       | 55      | 57       | 4,5   | 5     | 5     |
| 51      | 47      | 49       | 50       | 51      | 68       | 5     | 4,8   | 5,1   |
|         | 48      | 61       | 62       | 58      | 63       | 5,1   | 5,1   | 5,3   |
| 50      | 53      | 57       | 60       | 57      | 55       | 5,6   | 5,5   | 5,5   |
| 58      | 62      | 61       | 59       | 60      | 61       | 5,1   | 5,4   | 5,4   |
| 52      | 54      | 56       | 57       | 55      | 61       | 4,7   | 4,8   | 4,9   |
|         | 67      | 67       | 67       | 70      | 67       | 5,3   | 5,2   | 5,2   |
| 53      | 65      | 58       | 56       | 58      | 60       | 4,6   | 4,6   | 4,5   |
| 56      | 62      | 64       | 63       | 58      | 60       | 4,6   | 4,7   | 4,9   |
| 74      | 75      | 76       | 68       | 82      | 83       | 4,8   | 5     | 4,9   |
| 91      | 85      | 80       | 85       | 76      | 90       | 5,3   | 5,6   | 5,6   |
|         | 56      | 57       | 55       | 61      | 56       | 5     | 5     | 4,9   |
| 66      | 59      | 59       | 61       | 68      | 63       | 4,9   | 5     | 5     |
| 72      | 64      | 66       | 65       | 64      | 65       | 4,5   | 4,7   | 4,5   |
| 69      | 67      | 69       | 67       | 67      | 62       | 4,9   | 4,6   | 4,7   |
| 41      | 42      | 36       | 41       | 39      | 41       | 5,5   | 5,4   | 5,5   |
| 58      | 58      | 59       | 56       | 56      | 61       | 5     | 5     | 5,2   |
| 59      | 61      | 64       | 58       | 62      | 59       | 5,1   | 5     | 5,4   |
| 53      | 58      | 64       | 70       | 71      | 70       |       |       | 3,5   |
| 64      | 71      | 69       | 70       | 69      | 68       | 4,6   | 4,5   | 4,8   |

| T4co2 | T5co2 | T6co2 | T7co2 | T8co2 | T9co2 | T10co2 |
|-------|-------|-------|-------|-------|-------|--------|
| 4,6   | 4,7   | 4,3   | 4,4   | 4,5   | 4,6   | 4,4    |
| 4,7   | 5,1   | 5,1   | 5     | 5     | 4,8   | 5      |
| 4,8   | 4,7   | 4,2   | 4,4   | 4,4   | 4,6   | 4,4    |
| 5,1   | 4,6   | 4,6   | 4,8   | 5     | 4,8   | 4,6    |
| 4,3   | 4,5   | 4     | 4,8   | 4,9   | 4,9   | 4,8    |
| 5,3   | 5,2   | 4,7   | 4,9   | 4,9   | 4,8   | 4,9    |
| 4,6   |       | 4,6   | 4,2   | 4,2   | 4,2   | 4,4    |
| 3,8   |       | 5,3   | 5,5   | 5,6   | 5,4   | 5,5    |
| 4,5   |       | 3,6   | 3,9   | 3,7   | 3,7   | 3,7    |
| 4,5   | 4,2   | 4,5   | 4,8   | 4,7   | 4,8   | 4,8    |
| 5,3   |       | 3,9   | 4     | 4,2   | 4     | 4,3    |
| 5,4   |       | 5,3   | 5,2   | 5,2   | 5,1   | 5,1    |
| 5,5   | 5,5   | 5,3   | 5,4   | 5,4   | 5,4   | 5,4    |
| 4,6   | 4,6   | 4,5   | 4,2   | 4,6   | 4,6   | 4,6    |
| 5,1   | 5     | 5,4   | 5,3   | 5,4   | 5,4   | 5,4    |
| 4,4   | 4,1   | 3,6   | 3,5   | 3,4   |       | 3,7    |
| 4,7   |       | 5,1   | 5,1   | 5,2   | 5,2   | 5,1    |
| 5,1   | 4,7   | 4,7   | 5     | 5     | 5,1   | 4,8    |
| 5     |       | 5,1   | 4,9   | 5     | 4,9   | 5,1    |
| 5,4   | 5,5   | 5,3   | 5,4   | 5,2   | 5,3   | 5,2    |
| 5,4   | 5,4   | 5,4   | 5,3   | 5,4   | 5,5   | 5,4    |
| 4,7   | 4,8   | 4,9   | 4,8   | 4,9   | 4,6   | 4,7    |
| 5,5   |       | 5,5   | 5,3   | 5,4   | 5,4   | 5,2    |
| 4,5   | 4,5   | 4,6   | 4,3   | 4,6   | 4,5   | 4,5    |
| 4,9   | 4,8   |       |       |       |       |        |
| 5     | 5,2   | 4,5   | 4,7   | 4,9   | 4,8   | 4,7    |
| 5,5   | 5,6   | 5,5   | 5,3   | 5,5   | 5,5   | 5,4    |
| 5,1   |       | 4,9   | 5,1   | 5     | 5     | 5,1    |
| 5,1   | 4,9   | 4,9   | 4,9   | 5     | 4,9   | 4,7    |
| 4,9   | 4,7   | 3,9   | 3,8   | 4     | 4,2   | 4,1    |
| 4,9   | 4,5   | 4,4   | 4,6   | 4,7   | 4,9   | 4,5    |
| 5,5   | 5,3   | 5,3   | 5,3   | 5,4   | 5,5   | 5,4    |
| 5,2   | 5     | 5     | 5,2   | 4,9   | 5     | 5      |
| 5,3   | 5,4   | 5,1   | 5,2   | 5,2   | 5,3   | 5      |
| 3,8   |       |       | 4,8   | 4,8   | 5,1   | 4,8    |
| 4,5   | 4,6   | 4,5   | 4,6   | 4,6   | 4,8   | 4,7    |
