# Supplementary material for: Secondary Hyperalgesia Phenotypes Exhibit Differences in Brain Activation during Noxious Stimulation
Source: PubMed Central journal article supplement (PMC4304709; doi:10.1371/journal.pone.0114840), 2015-01-23
Supplement: pone.0114840.s003.pdf [file pone.0114840.s003.pdf]

| Data # | NRS_BL | NRS_SH | NRS_PH |
|--------|--------|--------|--------|
| H1     | 2      | 3      | 4      |
| L1     | 2,5    | 7,5    | 7      |
| L2     | 4      | 3      | 5      |
| H2     | 2      | 3      | 5      |
| H3     | 3      | 5      | 6      |
| H4     | 3      | 4      | 7      |
| H5     | 2      | 4      | 6      |
| H6     | 5      | 4      | 7      |
| H7     | 3      | 7      | 8      |
| L3     | 4      | 7      | 8      |
| H8     | 1      | 4      | 4      |
| H9     | 2      | 3,5    | 6      |
| H10    | 7      | 10     | 10     |
| H11    | 3      | 4      | 4      |
| L4     | 3      | 5      | 5      |
| H12    | 6      | 6      | 6      |
| L5     | 3      | 5      | 6      |
| H13    | 1      | 5      | 6      |
| H14    | 5      | 5      | 9      |
| H15    | 4      | 7      | 9      |
| L6     | 4      | 7      | 7,5    |
| L7     | 2      | 4      | 4      |
| H16    | 3      | 2      | 3      |
| L8     | 1      | 1      | 3      |
| H17    | 5      | 6      | 7      |
| H18    | 5      | 6      | 7      |
| L9     | 3      | 6,5    | 7      |
| L10    | 7      | 4,5    | 7,5    |
| H19    | 2      | 2      | 3      |
| L11    | 2      | 3      | 2      |
| L12    | 4      | 4      | 5      |
| L13    | 4      | 4,5    | 4,5    |
| L14    | 4      | 7      | 8      |
| H20    | 7      | 8,5    | 9,5    |
| L15    | 1      | 3      | 3      |
| L16    | 2,5    | 2      | 5      |
| L17    | 1,5    | 3      | 3,5    |
| L18    | 6      | 7      | 8      |
| L19    | 0      | 1      | 1      |
| L20    | 0      | 2      | 2      |

H: High-sensitization Responders

L: Low-sensitization Responders

NRS\_BL: Numeric Rating Scale after noxious stimulation at baseline

NRS\_SH: Numeric Rating Scale after noxious stimulation at Secondary hyperalgesia area

NRS\_PH: Numeric Rating Scale after noxious stimulation at Primary hyperalgesia area
