# Supplementary material for: Secondary Hyperalgesia Phenotypes Exhibit Differences in Brain Activation during Noxious Stimulation
Source: PubMed Central journal article supplement (PMC4304709; doi:10.1371/journal.pone.0114840), 2015-01-23
Supplement: pone.0114840.s004.pdf [file pone.0114840.s004.pdf]

| Data # | Sex | Group | PPT_M | PPT_converted | Data # |
|--------|-----|-------|-------|---------------|--------|
| H1     |     | 2 1   | 32    | 3             | L1     |
| H2     |     | 1 1   | 128   | 5             | L2     |
| H3     |     | 2 1   | 256   | 6             | L3     |
| H4     |     | 1 1   | 256   | 6             | L4     |
| H5     |     | 2 1   | 512   | 7             | L5     |
| H6     |     | 2 1   | 128   | 5             | L6     |
| H7     |     | 1 1   | 128   | 5             | L7     |
| H8     |     | 1 1   | 128   | 5             | L8     |
| H9     |     | 2 1   | 512   | 7             | L9     |
| H10    |     | 2 1   | 128   | 5             | L10    |
| H11    |     | 2 1   | 256   | 6             | L11    |
| H12    |     | 1 1   | 128   | 5             | L12    |
| H13    |     | 2 1   | 128   | 5             | L13    |
| H14    |     | 2 1   | 256   | 6             | L14    |
| H15    |     | 2 1   | 128   | 5             | L15    |
| H16    |     | 1 1   | 256   | 6             | L16    |
| H17    |     | 2 1   | 64    | 4             | L17    |
| H18    |     | 2 1   | 64    | 4             | L18    |
| H19    |     | 2 1   | 256   | 6             | L19    |
| H20    |     | 2 1   | 512   | 7             | L20    |

H: High-sensitization Responders

L: Low-sensitization Responders

PPT\_M: Weighted pins absol

PPT\_concerted: Weighted pi

Sex

1: Male

2: Female

Group

1: High-sensitization responders

2: Low-sensitization responders

| Sex | Group | PPT_M | PPT_converted |
|-----|-------|-------|---------------|
| 2   | 2     | 512   | 7             |
| 1   | 2     | 128   | 5             |
| 1   | 2     | 512   | 7             |
| 2   | 2     | 256   | 6             |
| 1   | 2     | 128   | 5             |
| 1   | 2     | 128   | 5             |
| 1   | 2     | 128   | 5             |
| 1   | 2     | 128   | 5             |
| 1   | 2     | 512   | 7             |
| 2   | 2     | 256   | 6             |
| 1   | 2     | 64    | 4             |
| 1   | 2     | 128   | 5             |
| 1   | 2     | 128   | 5             |
| 2   | 2     | 512   | 7             |
| 2   | 2     | 256   | 6             |
| 1   | 2     | 256   | 6             |
| 2   | 2     | 512   | 7             |
| 1   | 2     | 128   | 5             |
| 2   | 2     | 512   | 7             |
| 2   | 2     | 256   | 6             |

lute values

ins converted values
