# Supplementary material for: Secondary Hyperalgesia Phenotypes Exhibit Differences in Brain Activation during Noxious Stimulation
Source: PubMed Central journal article supplement (PMC4304709; doi:10.1371/journal.pone.0114840), 2015-01-23
Supplement: pone.0114840.s005.pdf [file pone.0114840.s005.pdf]

| H/L | Volunteer # | HADS    |            | PCS        |               |              | PCS_Total |
|-----|-------------|---------|------------|------------|---------------|--------------|-----------|
|     |             | Anxiety | Depression | Rumination | Maginificatic | Helplessness |           |
| H   | 1           | 1       | 1          | 1          | 0             | 0            | 1         |
| H   | 2           | 0       | 0          | 3          | 2             | 2            | 7         |
| H   | 3           | 5       | 1          | 6          | 1             | 4            | 11        |
| H   | 4           | 4       | 3          | 4          | 2             | 5            | 11        |
| H   | 5           | 2       | 3          | 7          | 2             | 3            | 12        |
| H   | 6           | 5       | 0          | 2          | 1             | 1            | 4         |
| H   | 7           | 4       | 1          | 6          | 3             | 2            | 11        |
| H   | 8           | 5       | 7          | 9          | 4             | 4            | 17        |
| H   | 9           | 6       | 4          | 0          | 0             | 2            | 2         |
| H   | 10          | 7       | 3          | 14         | 7             | 15           | 36        |
| H   | 11          |         |            |            |               |              |           |
| H   | 12          | 0       | 0          | 4          | 2             | 3            | 9         |
| H   | 13          | 15      | 4          | 10         | 7             | 7            | 24        |
| H   | 14          | 5       | 3          | 4          | 1             | 5            | 10        |
| H   | 15          | 8       | 6          | 8          | 9             | 8            | 25        |
| H   | 16          | 1       | 2          | 5          | 1             | 1            | 7         |
| H   | 17          | 9       | 2          | 9          | 6             | 9            | 24        |
| H   | 18          | 8       | 2          | 5          | 2             | 3            | 10        |
| H   | 19          | 8       | 1          | 5          | 3             | 6            | 14        |
| H   | 20          | 2       | 1          | 5          | 0             | 4            | 9         |
| L   | 21          | 0       | 1          | 4          | 0             | 0            | 4         |
| L   | 22          | 2       | 1          | 4          | 1             | 1            | 6         |
| L   | 23          | 4       | 1          | 7          | 3             | 3            | 13        |
| L   | 24          | 5       | 1          | 3          | 5             | 7            | 15        |
| L   | 25          | 0       | 0          | 0          | 0             | 0            | 0         |
| L   | 26          | 5       | 3          | 3          | 6             | 3            | 12        |
| L   | 27          | 4       | 5          | 4          | 2             | 2            | 8         |
| L   | 28          | 0       | 3          | 5          | 3             | 5            | 13        |
| L   | 29          | 8       | 3          | 4          | 0             | 1            | 5         |
| L   | 30          | 1       | 3          | 4          | 1             | 8            | 13        |
| L   | 31          | 2       | 1          | 3          | 2             | 2            | 7         |
| L   | 32          | 4       | 2          | 4          | 2             | 1            | 7         |
| L   | 33          | 4       | 0          | 4          | 2             | 4            | 10        |
| L   | 34          | 1       | 1          | 6          | 3             | 9            | 18        |
| L   | 35          |         |            |            |               |              |           |
| L   | 36          | 5       | 1          | 1          | 0             | 1            | 2         |
| L   | 37          | 4       | 1          | 2          | 2             | 2            | 6         |
| L   | 38          | 5       | 9          | 7          | 3             | 4            | 14        |
| L   | 39          | 2       | 0          | 1          | 1             | 2            | 4         |
| L   | 40          | 4       | 2          | 2          | 1             | 1            | 4         |

H: High-sensitization responders

L: Low-sensitization responders
